# Supplementary material for: Phenotypic Spectrum of NFIA Haploinsufficiency: Two Additional Cases and Review of the Literature
Source: MDPI journal article supplement (doi:10.3390/genes13122249), 2022-11-30
Supplement: s1 [file s1]

## Supplementary Tables

**Table S1.** Other defects described.

| OTHER DEFECTS |                                                                                                                                                                                                                         |
|---------------|-------------------------------------------------------------------------------------------------------------------------------------------------------------------------------------------------------------------------|
| P3            | -hypothyroidism secondary to partial thyroidectomy, (the indication for partial thyroidectomy was not clear from the patient's history);<br>-late menarche, and delayed development of secondary sexual characteristics |
| P14           | pulmonic stenosis                                                                                                                                                                                                       |
| P16           | polycystic ovarian syndrome                                                                                                                                                                                             |
| P17           | diabetes, pseudopapilledema                                                                                                                                                                                             |
| P18           | fibromyalgia, hyperthyroidism                                                                                                                                                                                           |
| P20           | Decreased circulating antibody level                                                                                                                                                                                    |
| P21           | Recurrent otitis media                                                                                                                                                                                                  |
| P25           | After birth, tachycardia                                                                                                                                                                                                |

Additional defects of the selected patients.

**Table S2. Excluded patients.** Excluded patients were characterized by other genetic alterations along with to those involving *NFIA*, by an absent or scanty phenotype, and by large deletions harboring *NFIA* (>1.5 MB) and other genes. For each patient the corresponding reference (literature and databases), the genetic alterations and the extent of each alteration are reported. The intragenic deletions/duplications of *NFIA* are referred to *NFIA*-207 transcript (ENST00000403491.8; RefSeq ID NM\_001134673).

| NFIA + ADDITIONAL GENETIC VARIANTS |                                                                                 |                                                                                  |
|------------------------------------|---------------------------------------------------------------------------------|----------------------------------------------------------------------------------|
| Lu et al., 2007 [5]<br>(DGAP089)   | t(1;2) (p31.3;q22.1), breakpoint in 1p31.3 spanning intron 7 of <i>NFIA</i>     | -2 Mb deletion in 2q14.3q21<br>-breakpoint in 1q22.1 spanning no coding sequence |
| Lu et al., 2007 [5]<br>(DGAP104)   | t(1;20) (p31.3;q13.31) breakpoint in 1p31.3 spanning intron 2 of <i>NFIA</i>    | breakpoint in 20q13.3 1spanning of <i>C20orf32</i>                               |
| Coci et al., 2016 [26]             | inv(1)(p36.31p31.3) breakpoint in 1p31.3 with deletion of <i>NFIA</i> exons 3-4 | breakpoint in 1p36.31p31 with deletion <i>CAMTA</i>                              |
| 285169 Decipher                    | 419 Kb duplication in 1p31.3 ( <i>NFIA</i> exons 3-11)                          | 2.07 Mb deletion in 15q13.2q13.3                                                 |
| 413383 Decipher                    | 383 Kb duplication in 1p31.3 ( <i>NFIA</i> exons 3-11)                          | 1.11 Mb deletion in 19p13.3                                                      |
| 480090 Decipher                    | 473 Kb duplication in 1p31.3 ( <i>NFIA</i> exons 3-11)                          | 333 Kb duplication in 11q23.2 harboring <i>NCAM1</i>                             |
| Ogura et al., 2022 [x][27]         | <i>NFIA</i> (p.Thr395Met; NM_001134673.4)                                       | [46,XY,t(1;5)(p31.1;q13.3)t(2;6)(q24.2;q23.1)]                                   |
| Revah-Politi et al., 2017          | <i>NFIA</i> (p.Arg69Ter; NM_001145512.1)                                        | <i>PTEN</i> (p.Pro96Ala; NM_000314.4)                                            |

|                                                                               |                                                                                                        |                                                                |
|-------------------------------------------------------------------------------|--------------------------------------------------------------------------------------------------------|----------------------------------------------------------------|
| [23] (case 4)                                                                 |                                                                                                        |                                                                |
| 263798Decipher                                                                | <i>NFIA</i> (p.Arg160Ter; ENST00000371189.8)                                                           | <i>SETD2</i> (p.Asp1713Gly; ENST00000409792.4)                 |
| 305440 Decipher                                                               | <i>NFIA</i> (p.Trp26Ter; ENST00000371189.8)                                                            | - <i>MYH9</i> (p.Lys1248Glu; ENST00000216181.11)               |
|                                                                               |                                                                                                        | - <i>COG4</i> (p.Arg502Trp; ENST00000323786.10)                |
|                                                                               |                                                                                                        | - <i>COL4A3</i> (p.Gly118Arg; ENST00000396578.8)               |
| Wongkittichote et al., 2022 [X][28]                                           | <i>NFIA</i> (c.819-1G>A; IVS5-1G>A; NM_001134673.4)                                                    | - <i>SCN2A</i> (p. Met640Thr; NM_021007.2)                     |
| ABSENT OR SCANTY PHENOTYPE                                                    |                                                                                                        |                                                                |
| 438681Decipher                                                                | 410 Kb duplication in 1p31.3 ( <i>NFIA</i> exons 3-11)                                                 | no phenotype                                                   |
| 438724 Decipher                                                               | 63 Kb deletion in 1p31.3 ( <i>NFIA</i> exon 2)                                                         | no phenotype                                                   |
| 480105 Decipher                                                               | 418 Kbduplication in 1p31.3 ( <i>NFIA</i> exons 3-11)                                                  | no phenotype                                                   |
| 260253 Decipher                                                               | 116 Kb deletion in 1p31.3 ( <i>NFIA</i> exons 3-10)                                                    | no phenotype                                                   |
| 274057 Decipher                                                               | 89,75 Kb duplication in 1p31.3 ( <i>NFIA</i> exons 10-11)                                              | phenotype scanty (global developmental delay)                  |
| 363965 Decipher                                                               | 23 Kb deletion in 1p31.3 ( <i>NFIA</i> intron 3) (CNV likely benign)                                   | phenotype scanty (micropenis, mild global developmental delay) |
| 342059 Decipher                                                               | 3Kb deletion in 1p31.3 ( <i>NFIA</i> intron 3) (CNV likely benign)                                     | phenotype scanty (global developmental delay)                  |
| Iossifov et al.,2012 [29]                                                     | <i>NFIA</i> (p.Arg83Ter; ENST00000371189.8)                                                            | phenotype scanty (autistic spectrum)                           |
| LARGE DELETIONS INCLUDING <i>NFIA</i>                                         |                                                                                                        |                                                                |
| Campbell et al.,2022 [10];<br>Lu et al., 2007 [5]<br>(DGAP205–1) (DGAP205-1s) | 12 Mb deletion in 1p31.2p32.3                                                                          |                                                                |
| Lu et al., 2007 [5]<br>(DGAP174)                                              | -2.2 Mb deletion in 1p31.3p32.1<br>-t(1;3)(p31.1;q25.1)breakpoint in 1p31.1 spanning <i>NEGR1</i> gene |                                                                |
| Koehler et al., 2010 [11]                                                     | 4.93 Mb deletion in 1p31.3p32.2                                                                        |                                                                |
| Chen et al., 2011 [12]                                                        | 22,2 Mb deletion in 1p32.3p31.1                                                                        |                                                                |
| Ji, Salamon, & Quintero-Rivera, 2014 [13]                                     | 22,88 Mb deletion in 1p31.1p32.2                                                                       |                                                                |
| Labonne et al., 2016 [14]                                                     | 9,45 Mb deletion 1p31.3p32.2                                                                           |                                                                |
| Prontera et al., 2017 [15]                                                    | 8,5 Mb deletion in 1p32.2p31.3                                                                         |                                                                |
| 353831 Decipher                                                               | 11,67 Mb deletion in 1p32.1p31.3                                                                       |                                                                |
| 251391 Decipher                                                               | 11,20 Mb deletion in 1p32.2p31.1                                                                       |                                                                |
| 276512 Decipher                                                               | 8,83 Mb deletion 1p31.3-1p32.1                                                                         |                                                                |
| 282222 Decipher                                                               | 7,99 Mb deletion 1p32.3p31.3                                                                           |                                                                |

|                 |                               |
|-----------------|-------------------------------|
| 317160 Decipher | 7,21 Mb deletion 1p32.1p31.3  |
| 264827 Decipher | 5,43 Mb deletion 1p31.3       |
| 261605 Decipher | 4,98 Mb deletion 1p32.1p31.3  |
| 401017 Decipher | 4,78 Mb deletion 1p32.2p31.3  |
| 379364 Decipher | 15,12 Mb deletion 1p32.2p31.1 |
| 2714 Decipher   | 13,77 Mb deletion 1p32.2p31.1 |
| 322751 Decipher | 7,21 Mb deletion 1p32.2p31.3  |
| 4638 Decipher   | 1,54 Mb deletion 1p32.1p31.3  |
| 438670 Decipher | 6,81 Mb deletion 1p32.1p31.3  |
| 285848 Decipher | 14,14 Mb deletion 1p32.1p31.3 |

Table S3. Comparison between NFIA-207 and NFIA-205 transcripts.

| NFIA<br>207<br>ex | NFIA205<br>ex | GRCh37/hg19           | aa sequence                         | patients | NFIA-207<br>variants                    | NFIA-205<br>variants                     |
|-------------------|---------------|-----------------------|-------------------------------------|----------|-----------------------------------------|------------------------------------------|
|                   | 1             | 61,547,534_61,547,719 | MQMCRPASSSVLYVPTRWPGGCGATWQSCPSPPPR |          |                                         |                                          |
|                   |               |                       |                                     | P16      |                                         | p.Gln54ProfsTer49                        |
|                   | 2             | 61,548,433_61,548,490 | RTRIPQRPAVMYSPLCLTQ                 |          |                                         | c.163-2A>G<br>SpliceAI: ΔS acceptor loss |
|                   |               |                       |                                     | P21      |                                         |                                          |
|                   |               |                       |                                     | P16      | p.Gln9ProfsTer49                        |                                          |
| 1                 |               | 61,548,233_61,548,490 | MYSPLCLTQ                           |          | c.28-2A>G<br>SpliceAI: ΔS acceptor loss |                                          |
|                   |               |                       |                                     | P21      |                                         |                                          |
|                   |               |                       |                                     | P17-18   | p. Arg24Ter                             | p. Arg69Ter                              |
|                   |               |                       | DEFHPFIEALLPHVRAFAFTWFNLQARKRKYFKKH | P22      | p.Arg38Ter                              | p.Arg83Ter                               |
|                   |               |                       | EKRMSKEEERAVKDELLSEKPEVKQKWASRLAKL  | P19      | p. Arg74Ter                             | p. Arg119Ter                             |
|                   |               |                       | RKDIRPEYREDFVLTVTGKKPPCCVLSPDQKGKM  | P20      | p.Leu75Pro                              | p.Leu120Pro                              |
|                   |               |                       | RRIDCLRQADKVVWRDLVMVILFKGIPLSTDGER  |          |                                         |                                          |
|                   |               |                       | LVKSPQCSNPGLCVQPHHIGVSVKELDLYLAYFVH | P24      | p.His167Arg                             | p.His212Arg                              |
|                   |               |                       | AAD                                 |          |                                         |                                          |
| 3                 | 4             | 61,743,192_61,743,257 | SSQSESPSQPSDADIKDQPENG              | P25-P26  | p.Lys125Glu                             | p.Lys170Glu                              |
| 4                 | 5             | 61,798,184_61,798,258 | HLGFQDSFVTSGVFSVTELVRSQT            |          |                                         |                                          |
| 5                 | 6             | 61,818,122_61,818,239 | PIAAGTGNFSLSDLESSSYYSMPGAMRRSLPST   |          |                                         |                                          |

| SSTS |    |                       |                                                                |     |                       |                     |
|------|----|-----------------------|----------------------------------------------------------------|-----|-----------------------|---------------------|
| 6    | 7  | 61,824,819_61,824,946 | STKRLKSVEDEMDSPGEEFFYTGQGRSPGSGSQSS<br>GWHEVEPG                |     |                       |                     |
| 7    | 8  | 61,848,909_61,849,037 | MPSPTTLKKSEKSGFSSPSPSQTSSTLGTFTQHHR<br>PVITGPRA                | P23 | p.Arg351Ter           | p.Arg396Ter         |
| 8    | 9  | 61,869,776_61,869,954 | SPHATPSTLHFPTSPIIQQPGPYFSPAIRYHPQE<br>TLKEFVQLVCPDAGQQAGQVGFNL | P15 | p.Pro365-<br>Hisfs*32 | p.Pro410 HisfsTer32 |
| 9    | 10 | 61,872,234_61,872,399 | PNGSSQGVHNPFLPTPMLPPPPPPPMARVPVLPV<br>PDTKPPTTSTEGGAASPTST     |     |                       |                     |
| 10   | 11 | 61,892,137_61,892,228 | YSTPSTSPANRFVSVGPRDPSFVNIPQQTQ                                 |     |                       |                     |
| 11   | 12 | 61,920,975_61,928,460 | SWYLG                                                          |     |                       |                     |

These two transcripts differ in the 5' region. For each isoform is reported the exon number, the coding sequence position (GRCh37/hg19), along with the corresponding amino acid sequence. The variants of the patients are described according to *NFIA*-207 and *NFIA*-205. In the amino acid sequence (aa sequence) column the conserved domains [NFI\_DNAbd\_pre-N/pfam10524 (orange), MH1/cl00055 (green), CTF\_NFI/pfam00859 (purple)] are also reported; the residues involved in the variations are highlighted, those overlap splice site are in italic. aa: amino acid; ex: exon; P: patient. *NFIA*-207 (ENST00000403491.8; RefSeq ID NM\_001134673) (red); *NFIA*-205 (ENST00000403491.8; RefSeq ID NM\_001145512.2) (blue).

**Table S4.** Neurodevelopmental details.

| DD/ID |                                                                                                                                                                                                                                                                                                                                                            |
|-------|------------------------------------------------------------------------------------------------------------------------------------------------------------------------------------------------------------------------------------------------------------------------------------------------------------------------------------------------------------|
| P4    | (MILD) The patient presented at 3 years with gross motor delay and delay of fine motor skills<br>Griffith's Developmental Assessment at that time was suggestive of poor locomotor and social skills and poor hand/eye coordination.<br>Her practical reasoning and speech skills were at a normal level; however, she had difficulties with articulation. |
| P6    | (MILD) Developmental milestones:<br>age at walking independently 18 months,<br>age at first word 12 months,<br>and age at completing sentences 4 years.                                                                                                                                                                                                    |
| P11   | (MILD) Developmental milestones:<br>age at walking independently 18 months,<br>age at first word 18 months,<br>and age at completing sentences 3 years.                                                                                                                                                                                                    |
| P15   | (MILD) Developmental milestones:<br>age at holding his head up 4 months and<br>age at walking without support at 1 year and 3 months.<br>age at speaking meaningful words at 2 years and 1 month,<br>His intelligence quotient at 4 years measured by the Tanaka–Binet Intelligence Scale was 75 (in the borderline range)                                 |

|     |                                                                                                                                                                                                                                                                                                                                                                                                                                                                                                                   |
|-----|-------------------------------------------------------------------------------------------------------------------------------------------------------------------------------------------------------------------------------------------------------------------------------------------------------------------------------------------------------------------------------------------------------------------------------------------------------------------------------------------------------------------|
| P16 | (NORMAL) Although she started speaking before 12 months of age,<br>she did not walk until about 17 months of age.<br>Neuropsychologic tests at 14 years of age showed her full-scale IQ (FSIQ) to be 97 (normal 94–102),<br>with a Verbal Comprehension (VCI) score in the high average range.<br>Her Perceptual Reasoning (PRI) and WorkingMemory (WMI) were both in the average range                                                                                                                           |
| P17 | (SEVERE) She was noted to have speech delay at 24 months (at which time she spoke less than 20 words and could not form two-to-three word sentences).<br>At the age of 3 years, she was unable to walk up stairs or climb.                                                                                                                                                                                                                                                                                        |
| P19 | (MODERATE/NORMAL) At the age of 3 month, he could not hold up his head; he was able to hold his head up at 6 months, sit alone at 10 months, and hold things to stand at 1 year old. He can call mom and dad with conscious at 1 year old.<br>At the age of 3 month, DDST (Denver DevelopmentalScreening Test) showed lower DQ (development quotient) (60, normal range >85), and lower MI (mental development index) (70, normal range >85).<br>At the age of 6 months, DDST showed a DQ of 83, and an MI of 89. |
| P25 | (SEVERE) She started to walk at the age of 3 years.<br>She also stated to speak her words at the age of 3 years and spoke only few words at the age of 6 years.<br>Her developmental quotient as assessed using the WISC-IV test was 23                                                                                                                                                                                                                                                                           |
| P26 | (MILD) He gained head control and rolling over at 8 months of age,<br>sat without support at 11 months of age, and slithering at 1 year of age.<br>He was able to stand with support at 1 year of age                                                                                                                                                                                                                                                                                                             |

ID: intellectual disability; DD: developmental delay.
